# Supplementary material
Source: PubMed Central journal article supplement (PMC3376237)
Supplement: NIHMS358263-supplement-01.pdf [file NIHMS358263-supplement-01.pdf]

# Outcome of Lower-Intensity Allogeneic Transplantation in Non-Hodgkin Lymphoma after Autologous Transplantation Failure

César O. Freytes,<sup>1</sup> Mei-Jie Zhang,<sup>2</sup> Jeanette Carreras,<sup>2</sup> Linda J. Burns,<sup>3</sup> Robert Peter Gale,<sup>4</sup> Luis Isola,<sup>5</sup> Miguel-Angel Perales,<sup>6</sup> Matthew Seftel,<sup>7</sup> Julie M. Vose,<sup>8</sup> Alan M. Miller,<sup>9</sup> John Gibson,<sup>10</sup> Thomas G. Gross,<sup>11</sup> Philip A. Rowlings,<sup>12</sup> David J. Inwards,<sup>13</sup> Santiago Pavlovsky,<sup>14,\*</sup> Rodrigo Martino,<sup>15</sup> David I. Marks,<sup>16</sup> Gregory A. Hale,<sup>17</sup> Sonali M. Smith,<sup>18</sup> Harry C. Schouten,<sup>19</sup> Simon Slavin,<sup>20</sup> Thomas R. Klumpp,<sup>21</sup> Hillard M. Lazarus,<sup>22</sup> Koen van Besien,<sup>18</sup> Parameswaran N. Hari.<sup>2</sup>

We studied the outcome of allogeneic hematopoietic stem cell transplantation (allo-HSCT) after lower-intensity conditioning regimens (reduced-intensity conditioning [RIC] and nonmyeloablative [NST]) in patients with non-Hodgkin lymphoma (NHL) who relapsed after autologous hematopoietic stem cell transplantation (auto-HSCT). Non-relapse mortality (NRM), lymphoma progression/relapse, progression-free survival (PFS), and overall survival (OS) were analyzed in 263 patients with NHL. All 263 patients had relapsed after a previous auto-HSCT and then had undergone allo-HSCT from a related (n = 26) or unrelated (n = 237) donor after RIC (n = 128) or NST (n = 135), and were reported to the Center for International Blood and Marrow Transplant Research between 1996 and 2006. The median follow-up of survivors was 68 months (range, 3-111 months). Three-year NRM was 44% (95% confidence interval [CI], 37%-50%). Lymphoma progression/relapse at 3 years was 35% (95% CI, 29%-41%). Three-year probabilities of PFS and OS were 21% (95% CI, 16%-27%) and 32% (95% CI, 27%-38%), respectively. Superior Karnofsky Performance Score, longer interval between transplantations, total body irradiation-based conditioning regimen, and lymphoma remission at transplantation were correlated with improved PFS. Allo-HSCT after lower-intensity conditioning is associated with significant NRM, but can result in long-term PFS. We describe a quantitative risk model based on pretransplantation risk factors to identify those patients likely to benefit from this approach.

*Biol Blood Marrow Transplant* ■ 1-10 (2012) © 2012 American Society for Blood and Marrow Transplantation

**KEY WORDS:** Non-Hodgkin lymphoma, Allogeneic, Relapse

From the <sup>1</sup>South Texas Veterans Health Care System/University of Texas Health Science Center, San Antonio, Texas; <sup>2</sup>Center for International Blood and Marrow Transplant Research, Medical College of Wisconsin, Milwaukee, Wisconsin; <sup>3</sup>University of Minnesota Medical Center, Minneapolis, Minnesota; <sup>4</sup>Celgene Corporation, Summit, New Jersey; <sup>5</sup>Mt Sinai Hospital, New York, New York; <sup>6</sup>Memorial Sloan-Kettering Cancer Center, New York, New York; <sup>7</sup>CancerCare Manitoba, University of Manitoba, Winnipeg, Canada; <sup>8</sup>University of Nebraska Medical Center, Omaha, Nebraska; <sup>9</sup>Baylor University Medical Center, Dallas, Texas; <sup>10</sup>Royal Prince Alfred Hospital, Camperdown, Australia; <sup>11</sup>Nationwide Children's Hospital, Ohio State University, Columbus, Ohio; <sup>12</sup>Calvary Mater Hospital, Waratah, Australia; <sup>13</sup>Mayo Clinic, Rochester, Minnesota; <sup>14</sup>Fundaleu, Buenos Aires, Argentina; <sup>15</sup>Hospital de la Santa Creu I Sant Pau, Barcelona, Spain; <sup>16</sup>Bristol Children's Hospital, Bristol, United Kingdom; <sup>17</sup>All Children's Hospital, St Petersburg, Florida; <sup>18</sup>University of Chicago Hospitals, Chicago, Illinois;

<sup>19</sup>University Hospital Maastricht, Maastricht, The Netherlands; <sup>20</sup>Hadassah Medical Center, Tel Aviv, Israel; <sup>21</sup>Temple University BMT Program, Philadelphia, Pennsylvania; and <sup>22</sup>University Hospitals Case Medical Center, Cleveland, Ohio.

Presented in part at the 50th American Society of Hematology Annual Scientific Meeting, San Francisco, California, December 2008.

*Financial disclosure:* See Acknowledgments on page XXX.

\*Deceased.

Correspondence and reprint requests: Parameswaran N. Hari, MD, Center for International Blood and Marrow Transplant Research, Medical College of Wisconsin, PO Box 26509, Milwaukee, WI 53226 (e-mail: [phari@mcw.edu](mailto:phari@mcw.edu)).

Received September 30, 2011; accepted December 16, 2011

© 2012 American Society for Blood and Marrow Transplantation 1083-8791/\$36.00

doi:10.1016/j.bbmt.2011.12.581

## INTRODUCTION

Autologous hematopoietic stem cell transplantation (auto-HSCT) is widely used to treat recurrent or refractory non-Hodgkin lymphoma (NHL) [1,2]. Unfortunately, relapse is common after auto-HSCT, and the prognosis for these patients is poor [3]. Conventional chemotherapy is noncurative after auto-HSCT failure, and a second auto-HSCT mostly benefits only a small group of patients who relapse after a long lymphoma-free interval [4,5]. The results of conventional myeloablative allogeneic hematopoietic stem cell transplantation (allo-HSCT) performed in this setting are also poor (5% progression-free survival [PFS] at 5 years), as reported previously [6]. In addition, many patients are not candidates for myeloablative conditioning because of advanced age or the presence of comorbidities.

Reduced-intensity conditioning (RIC) and non-myeloablative conditioning (NST) regimens are increasingly used in patients with NHL. These lower-intensity conditioning regimens reportedly have lower nonrelapse mortality (NRM) and can be used in older patients with comorbidities [7]. Lower-intensity regimens for allo-HSCT use lower doses of conditioning chemotherapy and radiation, and rely on an immune-mediated graft-versus-lymphoma (GVL) effect for disease control. The magnitude of this effect in the treatment of NHL is unclear [8,9].

Previous studies reporting on RIC or NST allo-HSCT in patients with NHL who relapsed after auto-HSCT have included limited numbers of patients, with variable histologies and variable follow-up, limiting comparisons [10-14]. To analyze the wider applicability and effectiveness of this modality, we analyzed long-term outcomes of lower-intensity (RIC/NST) allo-HSCT in patients with relapsed B cell NHL (B-NHL) after a previous auto-HSCT using data from the Center for International Blood and Marrow Transplant Research (CIBMTR). To date, this represents the largest study of patients with NHL treated with lower-intensity conditioning allo-HSCT after auto-HSCT failure.

## SUBJECTS AND METHODS

### Data Sources

The CIBMTR is a research affiliation of the International Bone Marrow Transplant Registry (IBMTR) and the National Marrow Donor Program (NMDP) established in 2004. It comprises a voluntary working group of more than 450 transplantation centers worldwide that contribute detailed data on consecutive allo- and auto-HSCTs to a Statistical Center at the Medical College of Wisconsin in Milwaukee and the NMDP Coordinating Center in Minneapolis. Participating

centers are required to report all HSCTs consecutively, with compliance monitored by onsite audits. Patients are followed longitudinally, with yearly follow-up. Computerized checks for discrepancies, physicians' reviews of submitted data, and onsite audits of participating centers ensure data quality. Observational studies conducted by the CIBMTR are performed in compliance with the Privacy Rule (HIPAA) as a public health authority and in compliance with all applicable federal regulations pertaining to the protection of human research participants, as determined by continuous review of the Institutional Review Boards of the NMDP and the Medical College of Wisconsin since 1985.

### Subjects

Outcomes of 263 adult patients (aged >21 years) with B-NHL who relapsed after auto-HSCT and then received a lower-intensity conditioning regimen followed by allo-HSCT between 1996 and 2006 were analyzed. Follicular, diffuse large B cell (DLBCL), and mantle cell lymphoma histologies were included. Recipients of planned tandem auto-/allo-HSCT and those in first complete response (CR) at the time of allo-HSCT were excluded. Donors were an HLA-matched sibling for 26 recipients and an HLA-matched unrelated donor (URD) for 237 recipients.

Only a limited number of patients who relapse after auto-HSCT subsequently undergo allo-HSCT. In the period 1990-2006, a total of 6395 patients with relapsed B-NHL after auto-HSCT registered with the CIBMTR, 373 of whom (5.8%) underwent subsequent allo-HSCT after an RIC/NST conditioning regimen. Our cohort is a subset of those patients for whom comprehensive data were available, with high-level reporting and complete case report forms. We confirmed that the global cohort and the study subset had similar outcomes.

### Definitions

Lower-intensity conditioning regimens were categorized as RIC or NST using established consensus criteria [15]. Previously established validated criteria for categorizing degree of HLA matching were used [16]. Well-matched cases had either no identified HLA mismatching and informative data at 4 loci or allele matching at HLA-A, -B, and -DRB1 (6/6).

### Endpoints

Primary outcomes were NRM, relapse/progression, PFS, and survival. NRM was defined as death from any cause during the first 28 days after transplantation or death without evidence of lymphoma progression/relapse. Progression was defined as an increase of  $\geq 25\%$  in the sites of lymphoma or development of new sites of lymphoma. Relapse was defined

as recurrence of lymphoma after a CR. For PFS, a patient was considered a treatment failure at the time of relapse/progression or death from any cause. Patients alive without evidence of disease relapse or progression were censored at last follow-up, and the PFS event was summarized by a survival curve. The OS interval variable was defined as the interval from the date of transplantation to the date of death or last contact and summarized by a survival curve. Other outcomes analyzed included acute and chronic graft-versus-host disease (GVHD) and cause of death. Acute GVHD was defined and graded based on the pattern and severity of organ involvement using established criteria [17]. Chronic GVHD was defined as the development of any chronic GVHD based on clinical criteria. Both of these events were summarized by the corresponding cumulative incidence estimate, with death without development of GVHD as the competing risk.

### Statistical Analyses

Probabilities of PFS and OS were calculated using the Kaplan-Meier product limit estimate. Probabilities of NRM, lymphoma progression/relapse, and acute and chronic GVHD were calculated using cumulative incidence curves to accommodate competing risks [18,19]. Associations among subject-, disease-, and transplantation-related factors and outcomes of interest were evaluated using multivariate Cox proportional hazards regression. A stepwise forward selection multivariate model was built to identify covariates that influenced outcomes. Covariates with a *P* value <.05 were considered significant. The proportionality assumption for Cox regression was tested by adding a time-dependent covariate for each risk factor and each outcome [20]. All variables met the proportional hazards assumption. Results are expressed as relative risk (RR) or the relative rate of occurrence of the event.

The following variables were considered in multivariate analyses: age at allo-HSCT, sex, Karnofsky Performance Score (KPS) at allo-HSCT, time from diagnosis to auto-HSCT, time between auto-HSCT and allo-HSCT, NHL histology, disease status and sensitivity to chemotherapy at allo-HSCT, conditioning regimen intensity (RIC versus NST), donor type (HLA-identical related versus HLA well-matched URD versus HLA partially matched URD), donor-recipient sex match (female donor and male recipient versus all other combinations), donor-recipient cytomegalovirus (CMV) state (donor and recipient CMV-seronegative versus all other combinations), graft source (bone marrow versus peripheral blood), year of allo-HSCT (1996-2003 versus 2004-2006) and type of GVHD prophylaxis. Information on the interval from auto-HSCT to relapse was not available in all patients; thus, the interval between auto-HSCT

and allo-HSCT was used as a surrogate variable, combining the interval from auto-HSCT to relapse and the interval from such relapse to allo-HSCT.

## RESULTS

### Patient- and Transplant-Related Variables

Patient-, disease-, and transplant-related characteristics are presented in Table 1. A total of 263 patients from 69 centers underwent allo-HSCT for NHL with lower-intensity conditioning after relapsing after a previous auto-HSCT. The median patient age at allo-HSCT was 52 years (range, 23-70 years). Eighty-nine patients (34%) had a KPS <90 at the time of allo-HSCT.

A total of 147 patients (56%) had DLBCL or follicular large cell NHL, 72 (27%) had mantle cell lymphoma, and 44 (17%) had follicular lymphoma. In 57 patients, DLBCL was reportedly the result of histological transformation from a lower-grade lymphoma. The median interval from diagnosis to auto-HSCT was 19 months (range, 2-278 months). Eighty-five patients (33%) underwent auto-HSCT within 1 year after diagnosis. The median interval between auto-HSCT and allo-HSCT was 25 months (range, 4-159 months). Fifty-two patients (20%) underwent allo-HSCT within 1 year after auto-HSCT, 80 patients (30%) did so between 1 and years after auto-HSCT, and 131 (50%) did so more than 2 years after auto-HSCT. Only 67 patients (27%) were in second or greater CR (CR2+) at the time of allo-HSCT. A total of 169 patients (63%) were considered to have chemotherapy-sensitive disease at allo-HSCT.

Conditioning regimens were classified as RIC in 128 patients (49%) and NST in 135 patients (51%). Sixty-six patients (25%) received total body radiation (TBI) of 2 Gy, 65 patients (25%) received lower-dose melphalan (<150 mg/m<sup>2</sup>), and 62 patients (24%) received fludarabine and cyclophosphamide regimens. Three-fourths of the patients received rituximab at some point before allo-HSCT. A bone marrow graft source was used in 21%. One hundred forty-one patients (54%) underwent allo-HSCT between 2004 and 2006. Seventeen (6%) received donor lymphocyte infusion (DLI) for relapse or failure to achieve CR after allo-HSCT. Median follow-up of survivors was 68 months (range, 3-111 months).

### Outcomes

Patient outcomes are summarized in Table 2. One hundred ninety-four of the 263 patients died (74%). Twenty-three patients (9%) were alive with lymphoma, and 46 (18%) were alive and lymphoma-free without relapse at last follow-up. The 100-day mortality rate was 30% (95% confidence interval [CI], 25%-36%). NRM rates were 39% (95% CI, 33%-45%)



**Table 1. Patient-, Disease- and Transplantation-Related Characteristics**

| Variable                                                       |            |
|----------------------------------------------------------------|------------|
| Number of patients                                             | 263        |
| Age at allo-HSCT, median (range), years                        | 52 (23-70) |
| Age at allo-HSCT, years, n (%)                                 |            |
| 21-30                                                          | 14 (5)     |
| 31-40                                                          | 34 (13)    |
| 41-50                                                          | 71 (27)    |
| 51-60                                                          | 107 (41)   |
| ≥61                                                            | 37 (14)    |
| Male sex, n (%)                                                | 168 (64)   |
| KPS <90 at allo-HSCT, n (%)                                    | 89 (34)    |
| Histology at allo-HSCT, n (%)                                  |            |
| Follicular large/DLBCL                                         | 147 (56)   |
| Follicular                                                     | 44 (17)    |
| Mantle cell                                                    | 72 (27)    |
| Histological transformation after diagnosis, n (%)             | 57 (22)    |
| Time from diagnosis to first auto-HSCT, months, median (range) | 19 (2-278) |
| Time from auto- to allo-HSCT, months, median (range)           | 25 (4-159) |
| Time from auto- to allo-HSCT, months, n (%)                    |            |
| <12                                                            | 52 (20)    |
| 12-24                                                          | 80 (30)    |
| >24                                                            | 131 (50)   |
| Disease status at allo-HSCT, n (%)                             |            |
| CR2+                                                           | 67 (27)    |
| PIF (never in CR)                                              | 22 (9)     |
| Relapse-sensitive                                              | 90 (36)    |
| Relapse-resistant                                              | 58 (23)    |
| Relapse unknown/untreated                                      | 14 (6)     |
| Chemosensitivity disease at allo-HSCT, n (%)                   |            |
| Sensitive                                                      | 159 (63)   |
| Others                                                         | 104 (37)   |
| Donor type, n (%)                                              |            |
| Related                                                        | 26 (10)    |
| Unrelated                                                      | 237 (90)   |
| Donor-recipient sex match, n (%)                               |            |
| M-M                                                            | 112 (43)   |
| M-F                                                            | 54 (21)    |
| F-M                                                            | 56 (21)    |
| F-F                                                            | 41 (16)    |
| Donor/recipient CMV status, n (%)                              |            |
| +/+                                                            | 50 (19)    |
| +/-                                                            | 23 (9)     |
| -/+                                                            | 90 (34)    |
| -/-                                                            | 87 (33)    |
| Not tested/inconclusive                                        | 11 (4)     |
| Conditioning regimen for allo-HSCT, n (%)                      |            |
| Low-dose TBI-based (<500 cGy)                                  | 9 (3)      |
| Melphalan dose ≤150 mg/m <sup>2</sup>                          | 65 (25)    |
| Busulfan dose ≤9 mg/kg                                         | 54 (21)    |
| TBI dose 200 cGy                                               | 66 (25)    |
| Fludarabine + cyclophosphamide                                 | 62 (24)    |
| Fludarabine only                                               | 7 (3)      |
| Conditioning regimen at second transplantation, n (%)          |            |
| Reduced-intensity                                              | 128 (49)   |
| Nonmyeloablative                                               | 135 (51)   |
| Rituximab before allo-HSCT, n (%)                              | 195 (74)   |
| Type of donor, n (%)                                           |            |
| Well matched                                                   | 150 (57)   |
| Partially matched                                              | 69 (26)    |
| Mismatched                                                     | 12 (5)     |
| Unrelated, matching unknown                                    | 6 (2)      |
| Related                                                        | 26 (10)    |
| Graft source, n (%)                                            |            |
| Bone marrow                                                    | 56 (21)    |
| Peripheral blood                                               | 207 (79)   |
| Year of allo-HSCT, n (%)                                       |            |
| 1996-1997                                                      | 2 (1)      |
| 1998-1999                                                      | 8 (3)      |
| 2000-2001                                                      | 41 (16)    |
| 2002-2003                                                      | 71 (27)    |

(Continued)

**Table 1. (Continued)**

| Variable                                                      |            |
|---------------------------------------------------------------|------------|
| 2004-2006                                                     | 141 (54)   |
| GVHD prophylaxis at allo-HSCT, n (%)                          |            |
| Methotrexate + cyclosporine ± other                           | 35 (13)    |
| Cyclosporine ± other                                          | 96 (37)    |
| Methotrexate + tacrolimus ± other                             | 72 (27)    |
| Tacrolimus ± other                                            | 51 (19)    |
| T-cell depletion ± other                                      | 4 (2)      |
| Other/unspecified                                             | 5 (2)      |
| Donor lymphocyte infusion after allo-HSCT, n (%) <sup>‡</sup> | 17 (6)     |
| Follow-up of survivors, months, median (range)                | 68 (3-111) |

<sup>‡</sup>Five patients (29%) are alive and 12 (71%) are dead. Sixteen patients (95%) relapsed/progressed after second transplantation. Completeness index follow-up, 90%.

at 1 year, 44% (95% CI, 37%-50%) at 3 years, and 47% (95% CI, 40%-53%) at 5 years after allo-HSCT. The incidence of lymphoma progression/relapse was 31% (95% CI, 25%-36%) at 1 year, 35% (95% CI, 29%-41%) at 3 years, and 36% (95% CI, 30%-42%) at 5 years after allo-HSCT. Figure 1A shows cumulative incidences of NRM and lymphoma progression/relapse.

Figure 1B shows actuarial probabilities of PFS and OS. PFS rates were 30% (95% CI, 25%-36%) at 1 year, 21% (95% CI, 16%-27%) at 3 years, and 17% (95% CI, 13%-22%) at 5 years after allo-HSCT. Corresponding OS rates were 44% (95% CI, 38%-50%), 32% (95% CI, 27%-38%) and 27% (95% CI, 21%-32%).

**Table 2. Univariate Outcome Probabilities**

| Outcome Event                                       | Probability (95% CI) <sup>‡</sup> |
|-----------------------------------------------------|-----------------------------------|
| 30-day mortality                                    | 10 (7-15)                         |
| 100-day mortality                                   | 30 (25-36)                        |
| Absolute neutrophil count >0.5 × 10 <sup>9</sup> /L |                                   |
| 28 days                                             | 91 (87-95)                        |
| 100 days                                            | 95 (92-97)                        |
| Acute GVHD at 100 days, grades II-IV                | 39 (34-45)                        |
| Chronic GVHD                                        |                                   |
| 1 year                                              | 37 (31-43)                        |
| 3 years                                             | 40 (34-46)                        |
| 5 years                                             | 40 (34-46)                        |
| NRM                                                 |                                   |
| 1 year                                              | 39 (33-45)                        |
| 3 years                                             | 44 (37-50)                        |
| 5 years                                             | 47 (40-53)                        |
| Progression/relapse                                 |                                   |
| 1 year                                              | 31 (25-36)                        |
| 3 years                                             | 35 (29-41)                        |
| 5 years                                             | 36 (30-42)                        |
| PFS                                                 |                                   |
| 1 year                                              | 30 (25-36)                        |
| 3 years                                             | 21 (16-27)                        |
| 5 years                                             | 17 (13-22)                        |
| OS                                                  |                                   |
| 1 year                                              | 44 (38-50)                        |
| 3 years                                             | 32 (27-38)                        |
| 5 years                                             | 27 (21-32)                        |

<sup>‡</sup>Probabilities of absolute neutrophil count >0.5 × 10<sup>9</sup>/L, acute and chronic GVHD, NRM, and progression/relapse were calculated using the cumulative incidence estimate; 100-day mortality, PFS, and OS were calculated using the Kaplan-Meier product limit estimate.

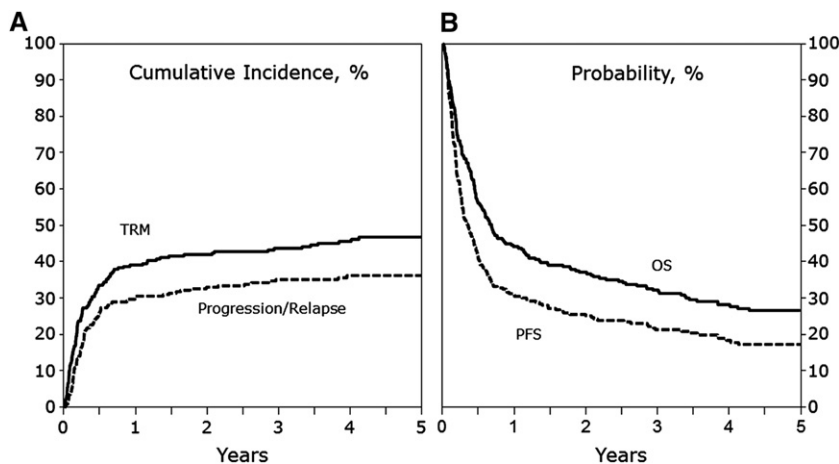

**Figure 1.** (A) Cumulative incidence of NRM and disease progression after RIC/NST in patients who relapsed after auto-HSCT for NHL. (B) Probabilities of PFS and OS after RIC/NST in patients who relapsed after auto-HSCT for NHL.

The incidence of grade II-IV acute GVHD within 100 days of transplantation was 39% (95% CI, 34%-45%). The incidence of chronic GVHD was 37% (95% CI, 31%-43%) at 1 year and 40% (95% CI, 34%-46%) at 5 years after allo-HSCT. PFS was not correlated with histological type of NHL (Figure 2), except for lower PFS (but not lower OS) in patients with transformed large cell lymphoma.

Seventeen patients received DLI after allo-HSCT for lymphoma progression/relapse. Survival after DLI was low: 12% (95% CI, 2%-31%) at 1 year, 6% (95% CI, 0-24%) at 3 years, and 6% (95% CI, 0-24%) at 5 years. Causes of death were lymphoma-relapse/progression in 50 patients (26%), infection in 33 (17%), organ failure in 32 (16%), and acute or chronic GVHD in 23 (12%) (Table 3).

(RR, 2.57; 95% CI, 1.57-3.25;  $P < .001$ ). Figure 3 illustrates the probability of NRM based on KPS.

#### Lymphoma progression/relapse

The interval between auto-HSCT and allo-HSCT was significantly correlated with the risk of lymphoma progression/relapse. Recipients of allo-HSCT within 2 years after auto-HSCT were at greater risk for progression/relapse (RR, 2.09; 95% CI, 1.37-3.18;  $P = .001$ ) (Figure 4).

#### PFS and treatment failure

Table 4 presents the results of multivariate analysis of PFS. Patients with a KPS  $<90$  had nearly a 2-fold increased risk of treatment failure, and lower PFS, compared with patients with a higher KPS (RR, 1.78; 95% CI, 1.33-2.40;  $P < .001$ ). Those undergoing allo-HSCT within 2 years after previous auto-HSCT had a lower PFS and higher risk of treatment failure (RR, 1.49; 95% CI, 1.13-1.96;  $P = .004$ ). Recipients of non-TBI-containing conditioning regimens had a lower PFS (RR of treatment failure, 1.66; 95% CI,

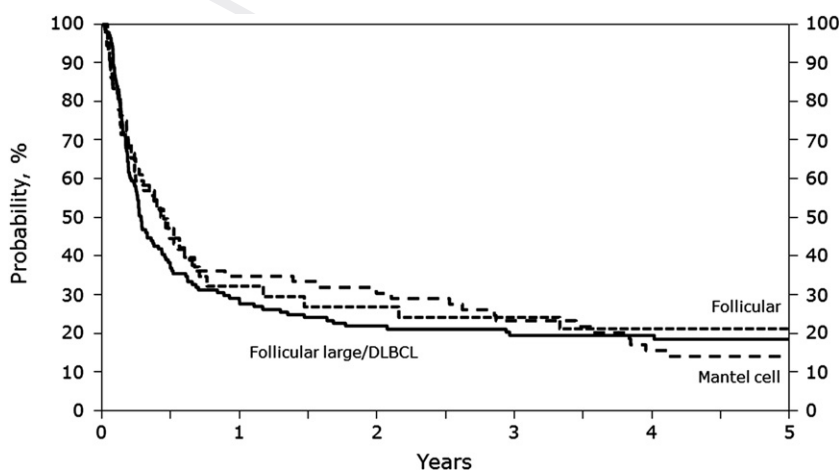

**Figure 2.** Probability of PFS after RIC/NST in patients who relapsed after auto-HSCT for NHL, according to histology at the time of RIC/NST.

[Q4] **Table 3. Causes of Death (n = 194 Patients Evaluated)**

| Cause of Death     | n (%)   |
|--------------------|---------|
| Primary disease    | 50 (26) |
| GVHD               | 23 (12) |
| Pulmonary syndrome | 11 (6)  |
| Infection          | 33 (17) |
| Organ failure      | 32 (16) |
| Hemorrhage         | 5 (3)   |
| New malignancy     | 2 (1)   |
| Vascular           | 2 (1)   |
| Unknown            | 36 (19) |

[Q2] 1.20-2.29;  $P = .002$ ). Supplemental Table 1 compares the clinical characteristics of patients receiving TBI and those receiving a non-TBI-based conditioning regimen. Patients who had never achieved CR (ie, primary induction failure [PIF]) had lower PFS (RR of treatment failure, 1.89; 95% CI, 1.12-3.18;  $P = .017$ ). Figure 5 shows the probability of PFS according to risk factors. Figure 6 shows PFS after allo-HSCT by individual conditioning regimens. The type of conditioning regimen, RIC versus NST, did not impact PFS.

### GVHD

Patients with KPS <90, those receiving a TBI-based conditioning regimen, and those receiving a graft from a female donor were at increased risk of developing grade II-IV acute GVHD. The sole variable correlated with chronic GVHD was the graft source; recipients of peripheral blood cell grafts were at greater risk than recipients of bone marrow grafts (RR, 2.45; 95% CI, 1.33-4.48;  $P = .004$ ). Patients with grade II-IV acute GVHD were less likely to develop lymphoma progression/relapse (RR, 0.55; 95% CI, 0.34-0.90;  $P = .0166$ ) in univariate analysis, but this difference was not statistically significant in the multivariate model. Chronic GVHD had no impact on the probability of lymphoma relapse/progression (RR, 0.71; 95% CI, 0.37-1.34;  $P = .2869$ ).

### OS

OS was significantly correlated with KPS. Patients with a KPS of < 90 had a greater risk of death (RR, 1.92; 95% CI, 1.43-2.56;  $P < .001$ ).

### Risk model

Based on the significant pretransplantation variables identified in the multivariate model, we developed a risk scoring system, outlined in Table 5. Patients with all 4 adverse risk factors (KPS <90, never in CR, non-TBI-based conditioning, and  $\leq 24$  months between auto-HSCT and allo-HSCT) had an 8.32-fold greater risk of death or relapse compared with patients with no risk factors. Similarly, patients with 3 risk factors (KPS <90, never in CR, and non-TBI-based conditioning) had a 5.58-fold greater risk of death or relapse, and those with 2 risk factors (KPS <90 and never in CR) had a 3.36-fold greater risk of death or relapse.

### DISCUSSION

The aims of the present study were to define outcomes after allo-HSCT using lower-intensity conditioning regimens in patients with B-NHL who relapsed after auto-HSCT, and to identify correlations between subject-, disease-, and treatment-related variables and outcomes. This study involves a large cohort of patients from multiple centers with long follow-up, thereby providing a perspective on the feasibility and effectiveness of this treatment strategy.

Despite the lower intensity of the conditioning regimens in our cohort, 3-year NRM was high at 44% (95% CI, 38%-46%). In multivariate analysis, KPS was the sole predictor of NRM; patients with a KPS <90 had a 2-fold greater NRM compared with patients with a KPS  $\geq 90$ . The NRM in this study is higher than previously reported values. In a study by

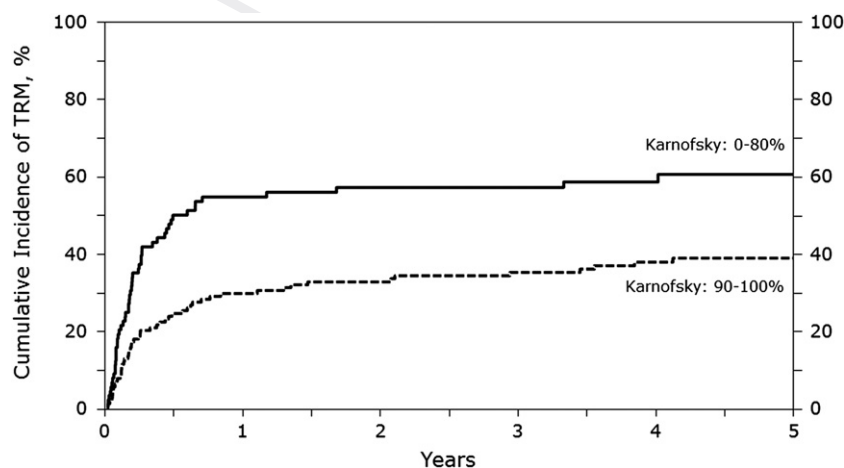

**Figure 3.** Probability of NRM after RIC/NST according to KPS in patients who relapsed after auto-HSCT for NHL.

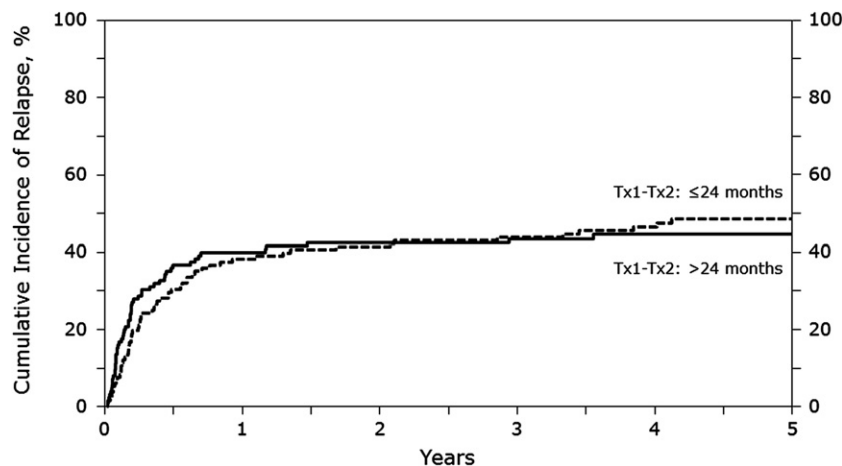

**Figure 4.** Probability of relapse after RIC/NST in patients who relapsed after auto-HSCT for NHL, according to the time interval between transplantations.

Branson et al. [21] using HLA-identical sibling donors, 14-month NRM was 20%. Martino et al. [7] reported a 24% NRM (95% CI, 15%-41%) at 1 year with HLA-identical sibling donors, and Escalon et al. [22] reported a 5% NRM in patients with chemosensitive lymphoma who received a transplant from an HLA-identical related donor. Baron et al. [23] reported a 28% NRM at 3 years after allo-HSCT from URDs. A recently published study by the European Group for Blood and Marrow Transplantation (EBMT) reported a 3-year NRM of 28.2% [24]. It is likely that differences in NRM between studies reflect differences in subject selection, proportion of unrelated donors, and width of CIs. Approximately 40% of the patients in our study had a KPS <90. Moreover, 90% of our patients received a URD transplant. Only ~60% of the URD transplants were well matched, lower than the proportions of well-matched URDs in other studies [22,23]. Another significant difference is that our study cohort was almost a decade older than the patients in most previous studies.

**Table 4. Multivariate Analysis for PFS**

| Variable                           | n   | RR of Relapse/Progression or Death (95% CI) | P Value |
|------------------------------------|-----|---------------------------------------------|---------|
| KPS                                |     |                                             |         |
| ≥90                                | 138 | 1.00                                        |         |
| <90                                | 119 | 1.78 (1.33-2.40)                            | <.001   |
| Time from auto-HSCT to allo-HSCT   |     |                                             |         |
| >24 months                         | 128 | 1.00                                        |         |
| ≤24 months                         | 129 | 1.49 (1.13-1.96)                            | .004    |
| Conditioning regimen for allo-HSCT |     |                                             |         |
| TBI-based                          | 73  | 1.00                                        |         |
| Non-TBI-based                      | 184 | 1.66 (1.20-2.29)                            | .002    |
| Disease status at allo-HSCT*       |     |                                             | .043    |
| CR2+                               | 67  | 1.00                                        |         |
| Relapse                            | 156 | 1.26 (0.90-1.75)                            | .177    |
| PIF                                | 22  | 1.89 (1.12-3.18)                            | .017    |
| Unknown                            | 12  | 0.75 (0.37-1.51)                            | .418    |

The risk for lymphoma progression/relapse was 31% (95% CI, 25%-36%) at 1 year and increased to 36% (95% CI, 30%-42%) at 5 years. These values are similar to those reported in previous studies [23,25]. The major risk factor correlated with risk of lymphoma progression/relapse was a shorter interval between auto-HSCT and allo-HSCT, which is likely a surrogate for a short time to relapse after auto-HSCT. In multivariate analyses, higher KPS, longer interval between auto-HSCT and allo-HSCT, use of TBI, and more favorable disease status at the time of transplantation were correlated with superior PFS. As in previous studies, disease status at the time of allo-HSCT was correlated with PFS. Patients with PIF (who had never achieved previous CR) were at greatest risk for treatment failure [7,23,26]. In previous studies, these patients were excluded or had worse outcomes [22,27]. Interestingly, the use of TBI in conditioning substantially improved PFS, consistent with the findings in our previous study of myeloablative allo-HSCT in this setting [6]. TBI also was found to decrease the rate of recurrence in a previous CIBMTR study of follicular lymphomas [8]. The quantitative risk model that we describe here is predictive of PFS and helps define the risks and benefits of allo-HSCT in this setting in practice.

Most previous studies had limited statistical power to detect differences in outcomes among lymphoma subtypes. Survival was similar in patients with DLBCL, follicular cell lymphoma, and mantle cell lymphoma in the present study. Although PFS was shorter in patients with histological transformation of follicular lymphoma, this did not translate into shorter OS.

The use of lower-intensity allo-HSCT is predicated on a GVL effect. Consistently detecting a GVL effect is difficult in this setting, however [8,9]. In the present study, patients with grade II-IV acute GVHD were less likely to develop lymphoma



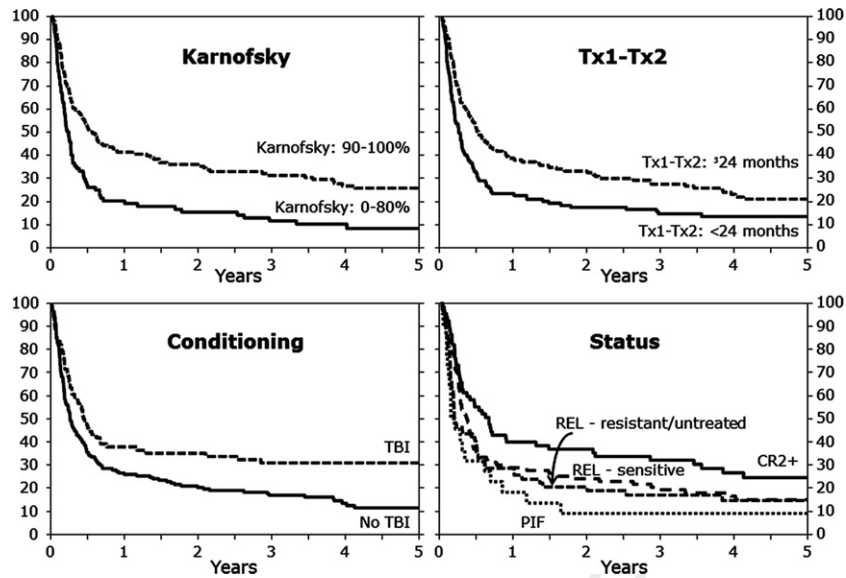

**Figure 5.** Probability of PFS after RIC/NST in patients who relapsed after auto-HSCT for NHL according to KPS, interval between auto-HSCT and RIC/NST, use of TBI-containing conditioning regimen, and disease status at the time of RIC/NST.

EQ2 progression/relapse, but this effect was not significant in multivariate analysis. In a small study, Mohty et al. [12] reported a correlation between acute GVHD and lymphoma relapse. Others have reported a correlation between chronic GVHD lymphoma progression/relapse, whereas the EBMT study found no beneficial effect of either acute or chronic GVHD [23-25]. In aggregate, these data do not support the presence of a strong, consistent GVL effect in this population of patients with advanced relapsed NHL.

The present study has several limitations. The interval between auto-HSCT and relapse and the time to allo-HSCT after relapse are relevant disease-related variables that were not available to us. Instead, we used the interval between auto-HSCT and allo-HSCT as a surrogate incorporating both time intervals. Furthermore, our study population did not include all patients who relapsed after auto-HSCT and were eligible for RIC/NST allo-HSCT. In fact,

only a minority of patients who relapse after auto-HSCT undergo allo-HSCT. The reasons for this are beyond the scope of our analysis, but might be related to the failure of salvage therapies for NHL relapse, early mortality after relapse, ineligibility for allo-HSCT, or patient/physician choice. Our results are applicable only to patients with NHL who undergo allo-HSCT.

Survival is poor in patients with NHL who relapse after auto-HSCT [28,29]. Our previous study reported only a 5% PFS at 5 years after myeloablative allo-HSCT for patients failing auto-HSCT [6]. Myeloablative conditioning in this setting has been largely abandoned in favor of lower-intensity conditioning regimens, as illustrated by the present study and the recent EBMT report [24]. Relapse or progression of NHL in this cohort of advanced, high-risk patients who underwent lower-intensity allo-HSCT was 36% at 5 years, with the vast majority of relapses occurring

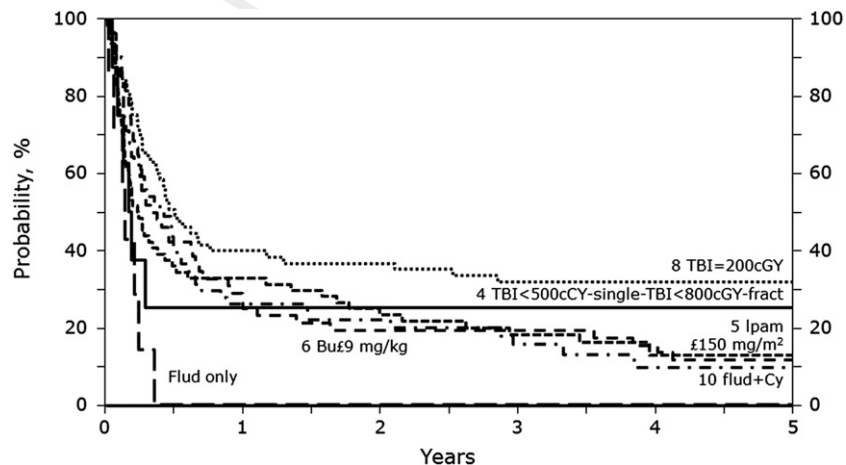

**Figure 6.** Probability of PFS after RIC/NST in patients who relapsed after auto-HSCT for NHL according to conditioning regimen.



**Table 5. Risk Factor Model for PFS**

| Combination of Variables                                                                | RR of Relapse/Progression or Death (95% CI) |
|-----------------------------------------------------------------------------------------|---------------------------------------------|
| KPS <90 + PIF at allo-HSCT + time between HSCTs ≤24 months + non-TBI-based conditioning | 8.32 (4.00-17.33)                           |
| KPS <90 + PIF at allo-HSCT + non-TBI-based conditioning                                 | 5.58 (2.82-11.04)                           |
| KPS <90 + PIF at allo-HSCT                                                              | 3.36 (1.84-6.13)                            |
| Time between HSCTs ≤24 months + non-TBI-based conditioning                              | 2.47 (1.61-3.81)                            |

within the first year after transplantation. However, NRM was also high, contributing to the 5-year PFS of 17% and OS of 27%. More effective and less-toxic conditioning regimens, as well as posttransplantation antilymphoma therapy, are needed to improve these outcomes, considering that disease progression and NRM are the most common cause of failure.

Despite these sobering results, our risk model based on pretransplantation characteristics defines a subset of patients that can benefit from lower-intensity allo-HSCT after auto-HSCT failure. Patients with late relapse, superior KPS, and controlled disease are especially likely to benefit from this approach and should be considered for this modality.

## ACKNOWLEDGMENTS

We thank Osman Ilhan, MD, James L. Gajewski, MD, Andrew L. Pecora, MD, David Rizzieri, MD, Edmund K. Waller, MD, PhD, Gustavo Milone, MD, Mitchell S. Cairo, MD, Brian J. Bolwell, MD, Leona A. Holmberg, MD, Nalini Janakiraman, MD, and Ginna Laport, MD for their helpful comments and insights.

**Financial disclosure:** The CIBMTR is supported by Public Health Service Grant/Cooperative Agreement U24-CA76518 from the National Cancer Institute, National Heart, Lung and Blood Institute, and National Institute of Allergy and Infectious Diseases; Grant/Cooperative Agreement 5U01HL069294 from the National Cancer Institute and National Heart, Lung and Blood Institute; Contract HSH234200637015C with the Health Resources and Services Administration; Grants N00014-06-1-0704 and N00014-08-1-0058 from the Office of Naval Research; and grants from Allos, Amgen, Angioblast, anonymous donation to the Medical College of Wisconsin, Ariad, Be the Match Foundation, Blue Cross and Blue Shield Association, Buchanan Family Foundation, CaridianBCT, Celgene, CellGenix, Children's Leukemia Research Association, Fresenius-Biotech North America, Gamida Cell Teva Joint Venture, Genentech, Genzyme, GlaxoSmithKline, Kiadis Pharma, Leukemia and Lymphoma Society, Medical College of Wisconsin, Millennium Pharmaceuticals,

Milliman USA, Miltenyi Biotec, National Marrow Donor Program, Optum Healthcare Solutions, Otsuka America Pharmaceutical, Seattle Genetics, Sigma-Tau Pharmaceuticals, Soligenix, Swedish Orphan Biovitrum, THERAKOS, and Wellpoint. The views expressed in this article do not reflect the official policy or position of the National Institutes of Health, Department of the Navy, Department of Defense, or any other agency of the US Government. [Q3]

## SUPPLEMENTARY DATA

Supplementary data related to this article can be found online at [doi:10.1016/j.bbmt.2011.12.581](https://doi.org/10.1016/j.bbmt.2011.12.581).

## REFERENCES

- Vose JM, Zhang MJ, Rowlings PA, et al. Autologous transplantation for diffuse aggressive non-Hodgkin's lymphoma in patients never achieving remission: a report from the Autologous Blood and Marrow Transplant Registry. *J Clin Oncol*. 2001;19:406-413.
- Lazarus HM, Loberiza FR Jr, Zhang MJ, et al. Autotransplants for Hodgkin's disease in first relapse or second remission: a report from the Autologous Blood and Marrow Transplant Registry (ABMTR). *Bone Marrow Transplant*. 2001;27:387-396.
- Copelan EA. Hematopoietic stem-cell transplantation. *N Engl J Med*. 2006;354:1813-1826.
- Smith SM, van Besien K, Carreras J, et al. Second autologous stem cell transplantation for relapsed lymphoma after a prior autologous transplant. *Biol Blood Marrow Transplant*. 2008;14:904-912.
- Vandenberghe E, Pearce R, Taghipour G, et al. Role of a second transplant in the management of poor-prognosis lymphomas: a report from the European Blood and Bone Marrow Registry. *J Clin Oncol*. 1997;15:1595-1600.
- Freytes CO, Loberiza FR, Rizzo JD, et al. Myeloablative allogeneic hematopoietic stem cell transplantation in patients who experience relapse after autologous stem cell transplantation for lymphoma: a report of the International Bone Marrow Transplant Registry. *Blood*. 2004;104:3797-3803.
- Martino R, Caballero MD, de la Serna J, et al. Low transplant-related mortality after second allogeneic peripheral blood stem cell transplant with reduced-intensity conditioning in adult patients who have failed a prior autologous transplant. *Bone Marrow Transplant*. 2002;30:63-68.
- van Besien K, Loberiza FR Jr, Bajorunaite R, et al. Comparison of autologous and allogeneic hematopoietic stem cell transplantation for follicular lymphoma. *Blood*. 2003;102:3521-3529.
- Bierman PJ, Sweetenham JW, Loberiza FR Jr, et al. Lymphoma Working Committee of the International Bone Marrow Transplant Registry and the European Group for Blood and Marrow Transplantation. Syngeneic hematopoietic stem-cell transplantation for non-Hodgkin's lymphoma: a comparison with allogeneic and autologous transplantation. *J Clin Oncol*. 2003;21:3744-3753.
- Nagler A, Or R, Naparstek E, et al. Second allogeneic stem cell transplantation using nonmyeloablative conditioning for patients who relapsed or developed secondary malignancies following autologous transplantation. *Exp Hematol*. 2000;28:1096-1104.
- Dey BR, McAfee S, Sackstein R, et al. Successful allogeneic stem cell transplantation with nonmyeloablative conditioning in patients with relapsed hematologic malignancy following autologous transplantation. *Biol Blood Marrow Transplant*. 2001;7:604-612.

- 1018 12. Mohty M, Fegueux N, Exbrayat C, et al. Reduced intensity  
1019 conditioning: enhanced graft-versus-tumor effect following  
1020 dose-reduced conditioning and allogeneic transplantation for  
1021 refractory lymphoid malignancies after high-dose therapy.  
1022 *Bone Marrow Transplant.* 2001;28:335-339.  
1023 13. Porter DL, Luger SM, Duffy KM, et al. Allogeneic cell therapy  
1024 for patients who relapse after autologous stem cell transplanta-  
1025 tion. *Biol Blood Marrow Transplant.* 2001;7:230-238.  
1026 14. Fung HC, Cohen S, Rodriguez R, et al. Reduced-intensity allo-  
1027 geneic stem cell transplantation for patients whose prior autolo-  
1028 gous stem cell transplantation for hematologic malignancy  
1029 failed. *Biol Blood Marrow Transplant.* 2003;9:649-656.  
1030 15. Bacigalupo A, Ballen K, Rizzo D, et al. Defining the intensity of  
1031 conditioning regimens: working definitions. *Biol Blood Marrow  
1032 Transplant.* 2009;15:1628-1633.  
1033 16. Weisdorf D, Spellman S, Haagenson M, et al. Classification of  
1034 HLA-matching for retrospective analysis of unrelated donor  
1035 transplantation: revised definitions to predict survival. *Biol Blood  
1036 Marrow Transplant.* 2008;14:748-758.  
1037 17. Przepiorka D, Weisdorf D, Martin P, et al. 1994 Consensus  
1038 Conference on Acute GVHD Grading. *Bone Marrow Transplant.*  
1039 1995;15:825-828.  
1040 18. Klein J, Moeschberger M. *Survival Analysis: Techniques of Cen-  
1041 sored and Truncated Data*, 2nd ed. New York: Springer-Verlag;  
1042 2003.  
1043 19. Kaplan E. Nonparametric estimation from incomplete observa-  
1044 tions. *J Am Stat Assoc.* 1958;53:457-481.  
1045 20. Cox DR. Regression models and life tables. *J R Stat Soc.* 1972;34:  
1046 187-220.  
1047 21. Branson K, Chopra R, Kottaridis PD, et al. Role of nonmyeloab-  
1048 lative allogeneic stem-cell transplantation after failure of autolo-  
1049 gous transplantation in patients with lymphoproliferative  
1050 malignancies. *J Clin Oncol.* 2002;20:4022-4031.  
1051 22. Escalon MP, Champlin RE, Saliba RM, et al. Nonmyeloablative  
1052 allogeneic hematopoietic transplantation: a promising salvage  
1053 therapy for patients with non-Hodgkin's lymphoma whose dis-  
1054 ease has failed a prior autologous transplantation. *J Clin Oncol.*  
1055 2004;22:2419-2423.  
1056 23. Baron F, Storb R, Storer BE, et al. Factors associated with  
1057 outcomes in allogeneic hematopoietic cell transplantation with  
1058 nonmyeloablative conditioning after failed myeloablative  
1059 hematopoietic cell transplantation. *J Clin Oncol.* 2006;24:  
1060 4150-4157.  
1061 24. van Kampen RJW, Canals C, Schouten HC, et al. Allogeneic  
1062 stem-cell transplantation as salvage therapy for patients with dif-  
1063 fuse large B-cell non-Hodgkin's lymphoma relapsing after an  
1064 autologous stem-cell transplantation: an analysis of the Euro-  
1065 pean Group for Blood and Marrow Transplantation Registry.  
1066 *J Clin Oncol.* 2011;29:1342-1348.  
1067 25. Rezvani AR, Norasetthada L, Gooley T, et al. Non-myeloablative  
1068 allogeneic haematopoietic cell transplantation for relapsed  
1069 diffuse large B-cell lymphoma: a multicentre experience. *Br J  
1070 Haematol.* 2008;143:395-403.  
1071 26. Devine SM, Sanborn R, Jessop E, et al. Fludarabine- and  
1072 melphalan-based conditioning for patients with advanced hema-  
1073 tological malignancies relapsing after a previous hematopoietic  
1074 stem cell transplant. *Bone Marrow Transplant.* 2001;28:557-562.  
1075 27. Freytes CO, Lazarus HM. Second hematopoietic SCT for lym-  
1076 phoma in patients who relapse after autotransplantation: an-  
1077 other autograft or switch to allograft? *Bone Marrow Transplant.*  
1078 2009;44:559-569.  
1079 28. Vose JM, Bierman PJ, Anderson JR, et al. Progressive disease af-  
1080 ter high-dose therapy and autologous transplantation for lym-  
1081 phoid malignancy: clinical course and patient follow-up. *Blood.*  
1082 1992;80:2142-2148.  
1083 29. Kewalramani T, Nimer SD, Zelenetz AD, et al. Progressive  
1084 disease following autologous transplantation in patients with  
1085 chemosensitive relapsed or primary refractory Hodgkin's dis-  
1086 ease or aggressive non-Hodgkin's lymphoma. *Bone Marrow  
1087 Transplant.* 2003;32:673-679.

1075  
1076  
1077  
1078  
1079  
1080  
1081  
1082  
1083  
1084  
1085  
1086  
1087  
1088  
1089  
1090  
1091  
1092  
1093  
1094  
1095  
1096  
1097  
1098  
1099  
1100  
1101  
1102  
1103  
1104  
1105  
1106  
1107  
1108  
1109  
1110  
1111  
1112  
1113  
1114  
1115  
1116  
1117  
1118  
1119  
1120  
1121  
1122  
1123  
1124  
1125  
1126  
1127  
1128  
1129  
1130  
1131

**AUTHOR QUERY FORM**

|                                                                                                      |                                                           |                                                                                                                                                                                             |
|------------------------------------------------------------------------------------------------------|-----------------------------------------------------------|---------------------------------------------------------------------------------------------------------------------------------------------------------------------------------------------|
| <br><b>ELSEVIER</b> | <b>Journal:</b> YBBMT<br><br><b>Article Number:</b> 52718 | <b>Please e-mail or fax your responses and any corrections to:</b><br><br><b>E-mail:</b> <a href="mailto:m.parrish@elsevier.com">m.parrish@elsevier.com</a><br><br><b>Fax:</b> 215-239-3388 |
|------------------------------------------------------------------------------------------------------|-----------------------------------------------------------|---------------------------------------------------------------------------------------------------------------------------------------------------------------------------------------------|

Dear Author,

Please check your proof carefully and mark all corrections at the appropriate place in the proof (e.g., by using on-screen annotation in the PDF file) or compile them in a separate list. Note: if you opt to annotate the file with software other than Adobe Reader then please also highlight the appropriate place in the PDF file. To ensure fast publication of your paper please return your corrections within 48 hours.

For correction or revision of any artwork, please consult <http://www.elsevier.com/artworkinstructions>.

Any queries or remarks that have arisen during the processing of your manuscript are listed below and highlighted by flags in the proof.

| <b>Location in article</b> | <b>Query / Remark: Click on the Q link to find the query's location in text<br/>Please insert your reply or correction at the corresponding line in the proof</b> |
|----------------------------|-------------------------------------------------------------------------------------------------------------------------------------------------------------------|
| <b>Q1</b>                  | The key words list must not contain any terms appearing in the article title. Please revise your list accordingly.                                                |
| <b>Q2</b>                  | This "Supplemental Table 1" is not included in the manuscript.                                                                                                    |
| <b>Q3</b>                  | Please provide a conflict of interest statement. If none exist, state "The authors have no conflicts of interest to disclose."                                    |
| <b>Q4</b>                  | Note the table renumbering to reflect the order of citation in the text body. Please verify.                                                                      |
| <b>Q5</b>                  | Table 3: In a table footnote, please indicate what the asterisk after "Disease status at allo-ASCT" indicates, or else delete it.                                 |
| <b>Q6</b>                  | Please confirm that given names and surnames have been identified correctly.                                                                                      |
| <b>EQ1</b>                 | Please check whether we have correctly typesetted the heading levels.                                                                                             |
| <b>EQ2</b>                 | In line no:812, please check whether end period is necessary after the phrase "in multivariate analysis".                                                         |

Thank you for your assistance.
